# Supplementary material for: Targeted genomic enrichment and sequencing of CyHV-3 from carp tissues confirms low nucleotide diversity and mixed genotype infections
Source: PubMed Central journal article supplement (PMC5045873; doi:10.7717/peerj.2516), 2016-09-27

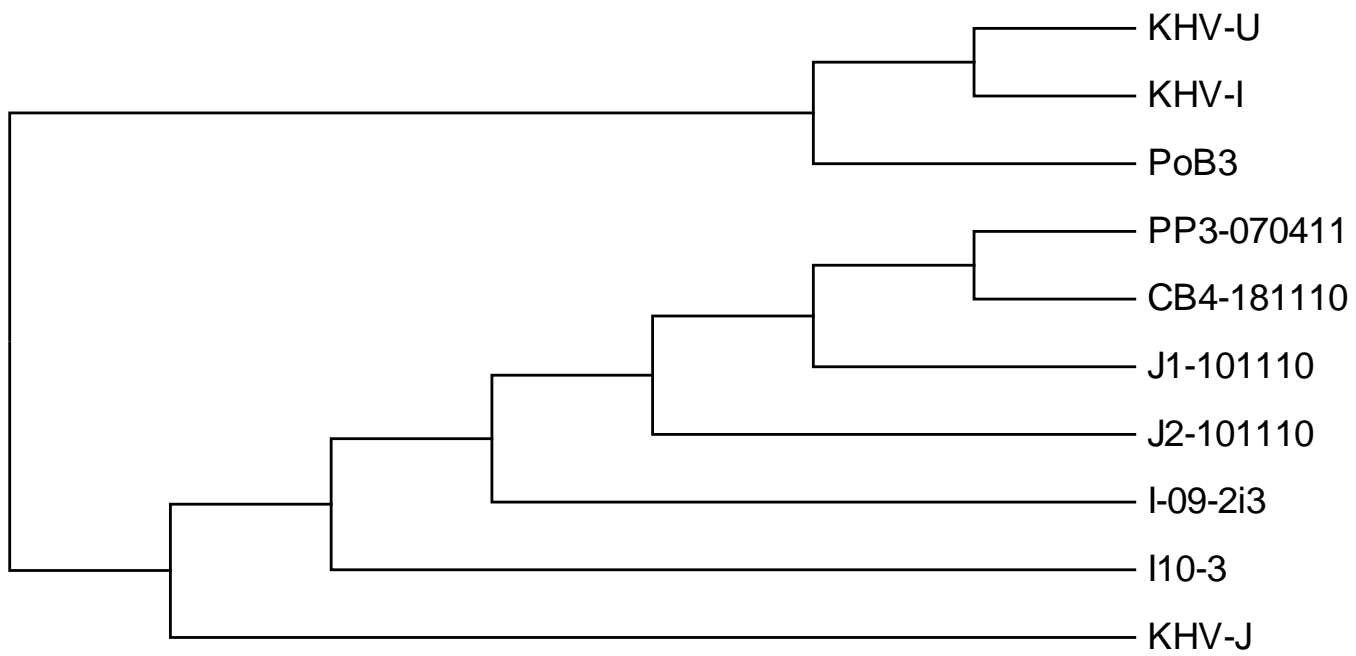

Supplement: peerj-04-2516-s004.pdf [file peerj-04-2516-s004.pdf]
